# Supplementary material for: Cytokine-Induced Loss of Glucocorticoid Function: Effect of Kinase Inhibitors, Long-Acting β2-Adrenoceptor Agonist and Glucocorticoid Receptor Ligands
Source: PubMed Central journal article supplement (PMC4308083; doi:10.1371/journal.pone.0116773), 2015-01-27
Supplement: pone.0116773.s001.pdf [file pone.0116773.s001.pdf]

## Supporting Figure S1

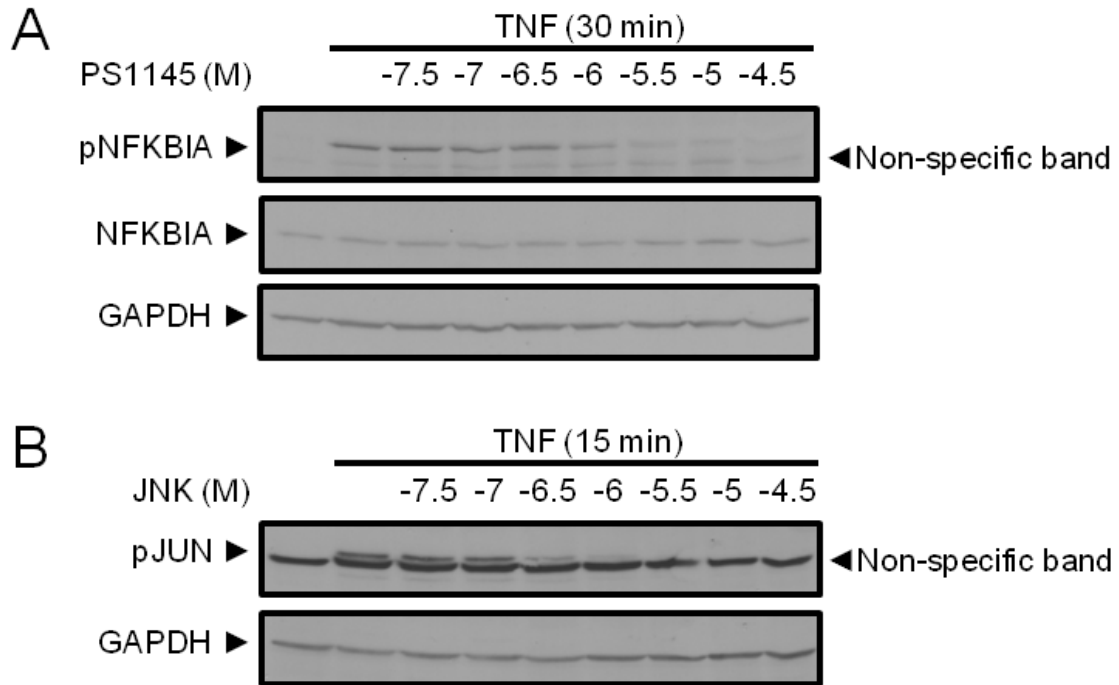

### Supporting Figure S1. PS1145, an IKK2 inhibitor, and JNK inhibitor VIII concentration-dependently inhibit phosphorylation of NFKBIA and JUN respectively

**A.** Human bronchial epithelial, BEAS-2B, cells were pre-treated for 30 min with the indicated concentrations of PS-1145 (PS), before addition of tumor necrosis factor- $\alpha$  (TNF). Cells were harvested after 2 min for western blotting and probed for phospho nuclear factor of kappa light polypeptide gene enhancer in B-cells inhibitor alpha (pNFKBIA; pI $\kappa$ B $\alpha$ ), NFKBIA and GAPDH. **B.** BEAS-2B cells were pre-treated for 30 min with the indicated concentrations of JNK inhibitor VIII (JNK), before addition of 10 ng/ml TNF. Cells were harvested after 15 min for western blotting and probed for phospho jun proto-oncogene (pJUN) and glyceraldehyde 3-phosphate dehydrogenase (GAPDH).
