# Supplementary material for: Cytokine-Induced Loss of Glucocorticoid Function: Effect of Kinase Inhibitors, Long-Acting β2-Adrenoceptor Agonist and Glucocorticoid Receptor Ligands
Source: PubMed Central journal article supplement (PMC4308083; doi:10.1371/journal.pone.0116773), 2015-01-27
Supplement: pone.0116773.s002.pdf [file pone.0116773.s002.pdf]

## Supporting Figure S2

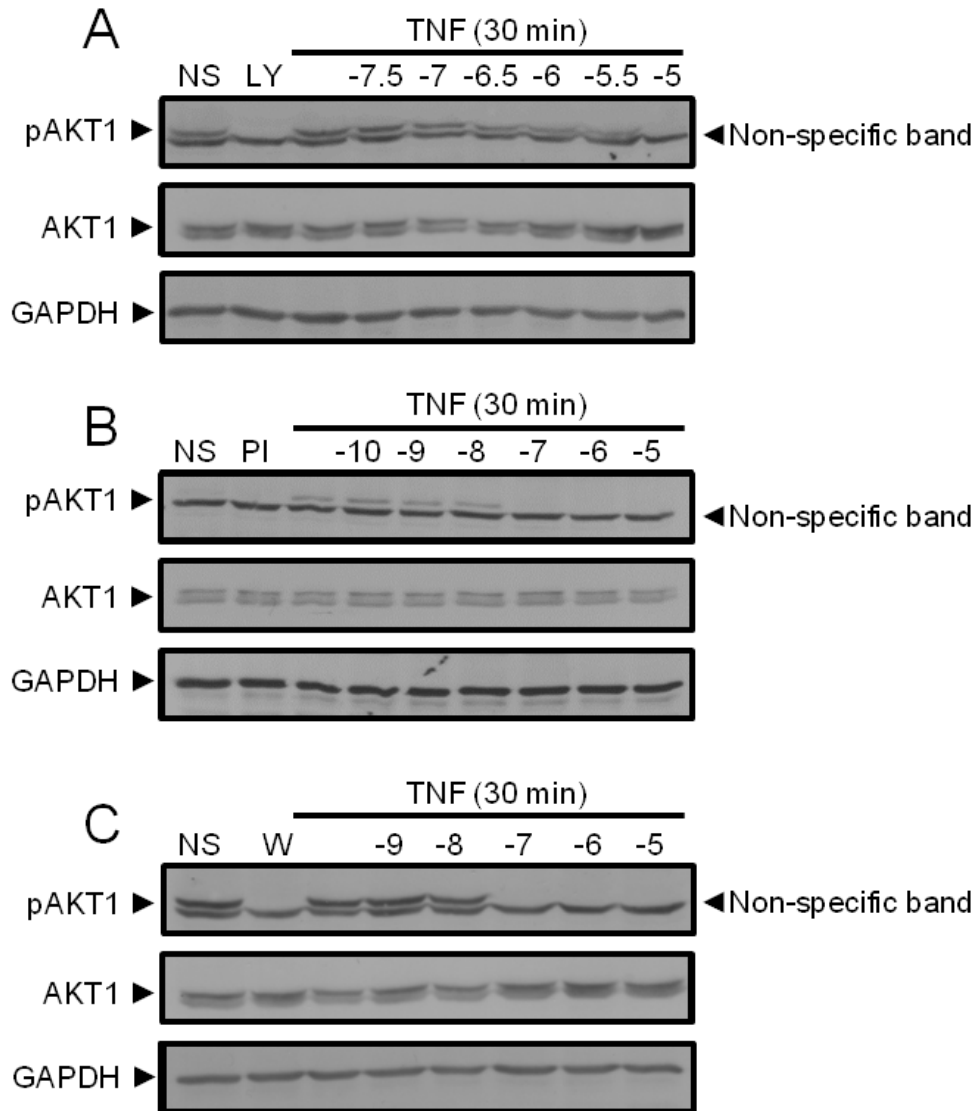

### Supporting Figure S2. PKC inhibitors concentration-dependently inhibit AKT1 phosphorylation

Human bronchial epithelial, BEAS-2B, cells were pre-treated for 30 min with the indicated concentrations of **A.** LY294002 (LY), **B.** PI103 (PI) or **C.** wortmannin (W), before addition of 10 ng/ml tumor necrosis factor- $\alpha$  (TNF). Cells were harvested after 30 min for western blotting and probed for phospho v-akt murine thymoma viral oncogene homolog 1 (pAKT1), AKT1 and glyceraldehyde 3-phosphate dehydrogenase (GAPDH).
